# Supplementary material for: MOG-expressing teratoma followed by MOG-IgG-positive optic neuritis
Source: Springer Nature journal article supplement (doi:10.1007/s00401-020-02236-5), 2020-10-19
Supplement: MOESM1 [file 18499036]

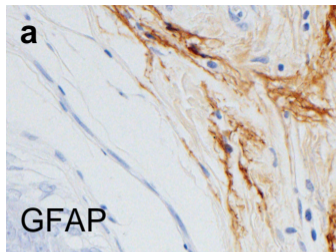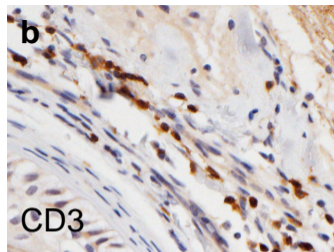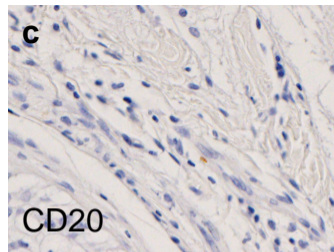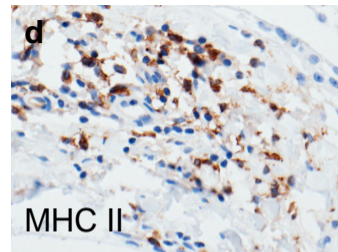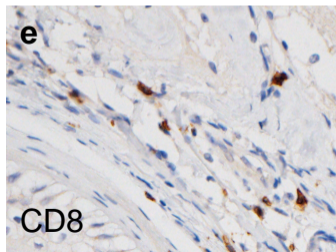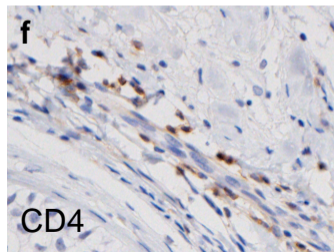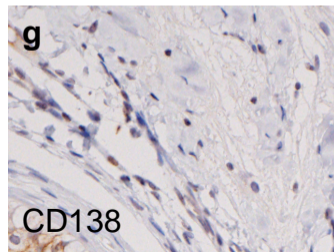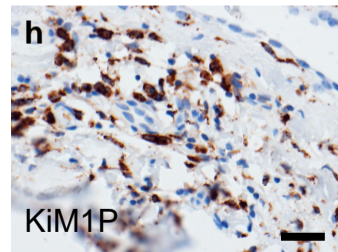

**Online Resource 1. Inflammatory infiltrate directly associated with the CNS-like tissue component.** CNS-like tissue identified by GFAP (**a**) was infiltrated by a mixed T-cell infiltrate (**b,e,f**) while CD20-positive B-cells (**c**) and CD138-positive plasma cells (**g**) were not observed in this area. Macrophages and DCs expressing MHC-II (**d**) and CD68 (clone KiM1P) (**h**) were frequently seen in the CNS-like tissue component. Scale bar length: 20  $\mu\text{m}$ .
